# Supplementary material
Source: PubMed Central journal article supplement (PMC2583673)
Supplement: supp_82_23_11503__1.pdf [file supp_82_23_11503__1.pdf]

TABLE 1. Oligonucleotides used for mutagenesis in the core/core+1 coding sequence

| Oligonucleotide <sup>a</sup> | Sequence                                                                                 |
|------------------------------|------------------------------------------------------------------------------------------|
| S413-mut1,2-JFH1             | CCG GGC GGC GGC CAG ATC <b>GTA</b> GGC GGA GTA TAC                                       |
| A427-mut1,2-JFH1             | CTG GCC GCC GCC CGG GAA CTT <b>TAC</b> GTC TTC                                           |
| S460-mut3,4-JFH1             | GGG CCC CAG GTT <b>AGG</b> TGT GAG AAC GAC AAG GAA AAC TTC GG                            |
| A500-mut3,4-JFH1             | CCG AAG TTT TCC TTG TCG <b>TTC</b> TCA CAC CTA ACC TGG GGC CC                            |
| S600-mut5-JFH1               | GGA ATG AGG GAC TAG GCT GGG CAG G                                                        |
| A624-mut5-JFH1               | CCT GCC CAG <b>CCT</b> AGT CCC TCA TTC C                                                 |
| S396-mutSL47                 | CAG AAG <b>ATG</b> TCA AGT TCC <b>CCG</b> GCG GCG GC                                     |
| A406-mutSL47                 | GAC <b>ATC</b> TTC TGG <b>CCT</b> CCG GTT GGT GTT TC                                     |
| S458-mutSL87                 | <b>CGC</b> GGG CCC <b>CGC</b> CTC GGT GTG CGC ACG ACA AGG                                |
| A472-mutSL87                 | <b>GAG</b> <b>GCG</b> GGG CCC <b>GCG</b> TCT CGG CAA CAA GTA TAC                         |
| S621-mutSL248                | <b>CTG</b> GTT GGT <b>TGT</b> TAA <b>GTC</b> CGC GTG GGT CTC GCC CCT C                   |
| A631-mutSL248                | <b>CAA</b> CCA ACC AGC CCA GCC CAG TCC CTC ATT CC                                        |
| S788-mutSL443                | <b>GCA</b> GTG GCC CAC GGC GTG CGA GTC CTG G                                             |
| A799-mutSL443                | GTG <b>GGC</b> CAC <b>TGC</b> TCG <b>CGC</b> GGC GCC ACT AAG                             |
| S343-JFH1                    | GAGGTCTCGTAGACCGTGCACCATG                                                                |
| A1394-JFH1                   | CAAGCCGAACATGACGCCCCAGTG                                                                 |
| A1817-JFH1                   | GGGACTACGCCACACGGCTTTGGG                                                                 |
| S438-mut1,2,3,4-H77          | GGA GTT TAC TTG TTG CCG CGC AGG GGC CCT AGA TTA GGT GTG <b>AGG</b> GCG ACG AGG AAG       |
| A452mut1,2,3,4-H77           | CAA CAA GTA AAC TCC ACC <b>TAC</b> GAT CTG ACC GCC ACC CGG GAA CTT <b>TAC</b> GTC CTG TG |
| A1150-H77                    | GTG GCG CTC CCG ACA AGC AG                                                               |
| S-T7                         | GCG GAC GCG ATG GAT ATG TTC                                                              |

<sup>a</sup> Numbers refer to the nucleotide position of HCV isolates JFH1 or H77 (GenBank accession no. AB047639 or AF009606, respectively). Substituted nucleotides are shown in bold.
